# Supplementary material for: Adherence to Clinical Practice Guidelines (CPG) management of dengue infection in adults (revised 2nd edition)
Source: PubMed Central journal article supplement (PMC5667811; doi:10.1371/journal.pone.0184559), 2017-11-02
Supplement: pone.0184559.s001.pdf [file pone.0184559.s001.pdf]

## S1 Appendix.

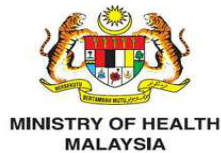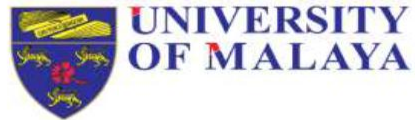

PRO-FORMA of MALAYSIAN CLINICAL PRACTICE  
GUIDELINE (CPG) ADHERENCE TO MANAGEMENT of  
DENGUE INFECTION IN ADULTS

INSTRUCTION: This questionnaire is divided into six (6) sections;

- Part 1: Baseline
- Part 2: Outpatient Department
- Part 3: Emergency Department
- Part 4: Medical Team
- Part 5: Intensive Care Unit
- Part 6: Overall outcome

Read the instruction carefully and please make sure all sections are filled with the right information. Thank you for your contribution in this project. Your contribution is highly appreciated.

Patient ID :

**BASELINE**

**Dengue CPG Adherence Pro-forma**

| Part I: Baseline data                                                                   |                                                                                                       |           |                |                           |    |     |
|-----------------------------------------------------------------------------------------|-------------------------------------------------------------------------------------------------------|-----------|----------------|---------------------------|----|-----|
| 1. Patient's Research ID                                                                |                                                                                                       |           |                |                           |    |     |
| 2. Date of Birth (DOB)                                                                  |                                                                                                       |           |                |                           |    |     |
| 3. IC number / Passport No.                                                             |                                                                                                       |           |                |                           |    |     |
| 4. Hospital Number/ RN                                                                  |                                                                                                       |           |                |                           |    |     |
| 5. Name of hospital                                                                     |                                                                                                       |           |                |                           |    |     |
| 6. Where was patient first seen?<br>(Please circle)<br>1- Available<br>2- Not available | If available (Please circle)<br>1. Health Clinic<br>2. ED<br>3. Hospital Out-patient department (OPD) |           |                |                           |    |     |
| 7. Date first seen at Health Facilities                                                 |                                                                                                       |           |                |                           |    |     |
| 8. Date of Admission (dd/mm/yyyy)                                                       |                                                                                                       |           |                |                           |    |     |
| 9. Date of Discharge (dd/mm/yyyy)                                                       |                                                                                                       |           |                |                           |    |     |
| 10. Previous history of visit to private institution                                    | Y=1,<br>a. Private clinic<br>b. Private hospital<br>N=2<br>NA=8                                       |           |                |                           |    |     |
| 11. Gender                                                                              | female (1) / male (2)                                                                                 |           |                |                           |    |     |
| 12. Body weight                                                                         | .....kg                                                                                               |           |                |                           |    |     |
| 13. Height                                                                              | .....cm                                                                                               |           |                |                           |    |     |
| <b>Co-morbidities</b>                                                                   | <b>Yes</b>                                                                                            | <b>No</b> | <b>Remarks</b> |                           |    |     |
| 14. Patients with co-morbidity                                                          |                                                                                                       |           |                |                           |    |     |
| a. Diabetes                                                                             |                                                                                                       |           |                |                           |    |     |
| b. Hypertension                                                                         |                                                                                                       |           |                |                           |    |     |
| c. Ischaemic Heart Disease                                                              |                                                                                                       |           |                |                           |    |     |
| d. Coagulopathies                                                                       |                                                                                                       |           |                |                           |    |     |
| e. Morbid Obesity                                                                       |                                                                                                       |           |                |                           |    |     |
| f. Renal Failure                                                                        |                                                                                                       |           |                |                           |    |     |
| g. Chronic Liver disease                                                                |                                                                                                       |           |                |                           |    |     |
| h. COPD                                                                                 |                                                                                                       |           |                |                           |    |     |
| i. Others (please specify)                                                              |                                                                                                       |           |                |                           |    |     |
| 15. Previous history of dengue                                                          |                                                                                                       |           |                |                           |    |     |
| 16. Elderly (more than 65 years old)                                                    |                                                                                                       |           |                |                           |    |     |
| 17. Pregnancy                                                                           |                                                                                                       |           |                |                           |    |     |
| 18. Social factors that limit follow-up e.g.                                            |                                                                                                       |           |                |                           |    |     |
| a. living far from health facility                                                      |                                                                                                       |           |                |                           |    |     |
| b. no transport                                                                         |                                                                                                       |           |                |                           |    |     |
| c. patient living alone                                                                 |                                                                                                       |           |                |                           |    |     |
| 19. Body Mass Index (BMI) kg/m <sup>2</sup>                                             |                                                                                                       |           |                |                           |    |     |
| <b>20. Dengue Confirmatory test</b>                                                     |                                                                                                       |           |                |                           |    |     |
|                                                                                         | Done (Y=1,N=2,NA=8)                                                                                   |           |                | +ve result (Y=1,N=2,NA=8) |    |     |
|                                                                                         | Yes                                                                                                   | No        | N/A            | Yes                       | No | N/A |
| a. Dengue Ig G (if high titre, please specify)                                          |                                                                                                       |           |                |                           |    |     |
| b. Dengue Ig M                                                                          |                                                                                                       |           |                |                           |    |     |
| c. NS1 Ag                                                                               |                                                                                                       |           |                |                           |    |     |

Patient ID :

OUT PATIENT DEPARTMENT

**Part II: Stepwise Approach on OUT-PATIENT Management of Dengue Infection**

VISIT :

DATE :

TIME :

**A. History**

|                                             | Documented |     | Please specify: |
|---------------------------------------------|------------|-----|-----------------|
|                                             | Y=1        | N=2 |                 |
| 1. Date of onset of fever                   |            |     |                 |
| a. Days of fever/illness                    |            |     |                 |
| 2. Oral intake                              |            |     |                 |
| 3. Diarrhea                                 |            |     |                 |
| 4. Bleeding                                 |            |     |                 |
| 5. Change in mental state/seizure/dizziness |            |     |                 |
| 6. Urine output                             |            |     |                 |
| a. Frequency                                |            |     |                 |
| b. Volume                                   |            |     |                 |
| c. Time of last voiding                     |            |     |                 |
| d. Others                                   |            |     |                 |

**B. Assess for warning signs**

|                                                                                                                      | Documented |     | Please specify |
|----------------------------------------------------------------------------------------------------------------------|------------|-----|----------------|
|                                                                                                                      | Y=1        | N=2 |                |
| 1. Abdominal pain or tenderness                                                                                      |            |     |                |
| 2. Persistent vomiting                                                                                               |            |     |                |
| 3. Clinical fluid accumulation (pleural effusion, ascites)                                                           |            |     |                |
| 1. Mucosal bleed                                                                                                     |            |     |                |
| 2. Restlessness or lethargy                                                                                          |            |     |                |
| 3. Tender enlarged liver                                                                                             |            |     |                |
| 7. Laboratory : Increase in HCT concurrent with rapid decrease in platelet<br>* if any FBC available, considered yes |            |     |                |

**OUT PATIENT DEPARTMENT**

**C. Other important relevant histories**

|    |                                                                                            | Documented |     | Please specify |
|----|--------------------------------------------------------------------------------------------|------------|-----|----------------|
|    |                                                                                            | Y=1        | N=2 |                |
| 1. | Family or neighborhood history of dengue                                                   |            |     |                |
| 2. | Jungle trekking and swimming in waterfall (consider leptospirosis, typhus, malaria)        |            |     |                |
| 3. | Recent travel                                                                              |            |     |                |
| 4. | Recent unprotected sexual or drug use behavior (consider acute HIV seroconversion illness) |            |     |                |

**D. Physical examination**

|    |                                                        | Documented |     | Please specify |
|----|--------------------------------------------------------|------------|-----|----------------|
|    |                                                        | Y=1        | N=2 |                |
| 1. | Assess mental state and Glasgow Coma Scale (GCS) score |            |     |                |
| 2. | Assess hydration status                                |            |     |                |
| 3. | Look out for tachypnea/ acidotic breathing             |            |     |                |
| 4. | Look out for pleural effusion                          |            |     |                |
| 5. | Examine for bleeding manifestation                     |            |     |                |
| 6. | Check for abdominal tenderness                         |            |     |                |
| 7. | Check for hepatomegaly                                 |            |     |                |
| 8. | Check for ascites                                      |            |     |                |

**E. Assess haemodynamic status**

|    |                                            | Documented |     | Record value (if available) |
|----|--------------------------------------------|------------|-----|-----------------------------|
|    |                                            | Y=1        | N=2 |                             |
| 1. | Skin color                                 |            |     |                             |
| 2. | Cold/ warm extremities                     |            |     |                             |
| 3. | Capillary filling time (normal <2 seconds) |            |     |                             |
| 4. | Pulse rate                                 |            |     |                             |
| 5. | Pulse volume                               |            |     |                             |
| 6. | Blood pressure                             |            |     |                             |
| 7. | Pulse pressure                             |            |     |                             |

**F. Investigations**

|    |                                   | Documented |     | Blood result |
|----|-----------------------------------|------------|-----|--------------|
|    |                                   | Y=1        | N=2 |              |
| 1. | FBC                               |            |     | WBC:         |
|    |                                   |            |     | HB:          |
|    |                                   |            |     | PLT:         |
| 2. | HCT                               |            |     |              |
| 3. | Dengue serology/Dengue rapid test |            |     |              |

**OUT PATIENT DEPARTMENT**

**G. Diagnosis/Notification**

|    |                                                    | Tick (✓) where appropriate | Please specify |
|----|----------------------------------------------------|----------------------------|----------------|
| 1. | Phase of illness                                   |                            |                |
|    | a. Febrile                                         |                            |                |
|    | b. Defervescence / critical                        |                            |                |
|    | c. Recovery                                        |                            |                |
| 2. | Dengue without warning sign                        |                            |                |
| 3. | Dengue with warning sign                           |                            |                |
| 4. | Severe dengue                                      |                            |                |
|    | a. Severe plasma leakage                           |                            |                |
|    | b. Severe bleeding                                 |                            |                |
|    | c. Severe organ impairment                         |                            |                |
| 5. | Notification within 24 hours from diagnosis        |                            |                |
| 6. | Outcome                                            |                            |                |
|    | a. Referral to hospital<br>b. Outpatient follow up |                            |                |

**H. Interval visit before admission.**

|                                                       |                  |
|-------------------------------------------------------|------------------|
| 1. Number of daily review                             | _____ days       |
| 2. Home Care Advice Leaflet for Dengue Patients given | Y = 1, N=2, NA=8 |

**I. Prerequisites for transfer**

|                                                                                                | Documented |     | Please specify: |     |         |
|------------------------------------------------------------------------------------------------|------------|-----|-----------------|-----|---------|
|                                                                                                | Y=1        | N=2 | Appropriate     |     | Remarks |
|                                                                                                | Y=1        | N=2 | Y=1             | N=2 |         |
| 1. Patient was *optimized pretransfer                                                          |            |     |                 |     |         |
| 2. ED/Medical was informed pretransfer                                                         |            |     |                 |     |         |
| 3. Adequate Information includes fluid chart, monitoring chart and investigation Results given |            |     |                 |     |         |

\* optimize: complete resuscitation (stable VS)

OUT PATIENT DEPARTMENT

**J. Referral from primary care providers to hospital**

1. REFERRAL LETTER:

- a. Available= 1
- b. Not available= 2 (proceed to Part III if letter not available)

|                                                                                                                      |                                                                             | Documented |     | Please specify |
|----------------------------------------------------------------------------------------------------------------------|-----------------------------------------------------------------------------|------------|-----|----------------|
|                                                                                                                      |                                                                             | Y=1        | N=2 |                |
| 2.                                                                                                                   | Symptoms :                                                                  |            |     |                |
|                                                                                                                      | a. Presence of 1 or more warning sign<br><b>*refer to section B</b>         |            |     |                |
|                                                                                                                      | b. Bleeding manifestations                                                  |            |     |                |
|                                                                                                                      | c. Inability to tolerate oral fluids                                        |            |     |                |
|                                                                                                                      | d. Reduced urine output                                                     |            |     |                |
| 3.                                                                                                                   | e. Seizure                                                                  |            |     |                |
|                                                                                                                      | Signs :                                                                     |            |     |                |
|                                                                                                                      | a. Dehydration                                                              |            |     |                |
|                                                                                                                      | b. Shock                                                                    |            |     |                |
|                                                                                                                      | c. Compensated shock                                                        |            |     |                |
| 4.                                                                                                                   | d. Bleeding                                                                 |            |     |                |
|                                                                                                                      | e. Any organ failure                                                        |            |     |                |
|                                                                                                                      | Special Situations :                                                        |            |     |                |
|                                                                                                                      | a. Patients with any of co-morbidity list :                                 |            |     |                |
|                                                                                                                      | i. Diabetes                                                                 |            |     |                |
|                                                                                                                      | ii. Hypertension                                                            |            |     |                |
|                                                                                                                      | iii. Ischaemic Heart Disease                                                |            |     |                |
|                                                                                                                      | iv. Coagulopathies                                                          |            |     |                |
|                                                                                                                      | v. Morbid Obesity                                                           |            |     |                |
|                                                                                                                      | vi. Renal Failure                                                           |            |     |                |
|                                                                                                                      | vii. Chronic Liver disease                                                  |            |     |                |
|                                                                                                                      | viii. COPD                                                                  |            |     |                |
|                                                                                                                      | b. Elderly (more than 65 years old)                                         |            |     |                |
| c. Pregnancy                                                                                                         |                                                                             |            |     |                |
| d. Social factors that limit follow-up e.g. living far from health facility, no transport, patient living alone, etc |                                                                             |            |     |                |
| 5.                                                                                                                   | Laboratory Criteria:                                                        |            |     |                |
|                                                                                                                      | a. Rising HCT with reducing platelet count *<br>(* minimum 1 result of FBC) |            |     |                |

**EMERGENCY DEPARTMENT**

Patient ID : 

|  |  |  |
|--|--|--|
|  |  |  |
|--|--|--|

**Part III: ON ARRIVAL to hospital / EMERGENCY DEPARTMENT (data- admitting unit)**

**VISIT:**  
**DATE:**  
**TIME:**  
**ZONE:**

**A. History**

|    |                                          | Documented |     | Please specify |
|----|------------------------------------------|------------|-----|----------------|
|    |                                          | Y=1        | N=2 |                |
| 1. | Date of onset of fever/ illness          |            |     |                |
| 2. | Oral intake                              |            |     |                |
| 3. | Diarrhoea                                |            |     |                |
| 4. | Bleeding                                 |            |     |                |
| 5. | Change in mental state/seizure/dizziness |            |     |                |
| 6. | Urine output                             |            |     |                |
|    | a. Frequency                             |            |     |                |
|    | b. Volume                                |            |     |                |
|    | c. Time of last voiding                  |            |     |                |

**B. Assess for warning sign**

|    |                                                                         | Documented |     | Please specify |
|----|-------------------------------------------------------------------------|------------|-----|----------------|
|    |                                                                         | Y=1        | N=2 |                |
| 1. | Abdominal pain or tenderness                                            |            |     |                |
| 2. | Persistent vomiting                                                     |            |     |                |
| 3. | Clinical fluid accumulation (pleural effusion, ascites)                 |            |     |                |
| 4. | Mucosal bleed                                                           |            |     |                |
| 5. | Restlessness or lethargy                                                |            |     |                |
| 6. | Tender enlarged liver                                                   |            |     |                |
| 7. | Laboratory : Increase in HCT concurrent with rapid decrease in platelet |            |     |                |

**EMERGENCY DEPARTMENT**

**C. Physical examination**

|    |                                                        | Documented |     | Please specify |
|----|--------------------------------------------------------|------------|-----|----------------|
|    |                                                        | Y=1        | N=2 |                |
| 1. | Assess mental state and Glasgow Coma Scale (GCS) score |            |     |                |
| 2. | Assess hydration status                                |            |     |                |
| 3. | Look out for tachypnoea                                |            |     |                |
| 4. | Look out acidotic breathing                            |            |     |                |
| 5. | Look out for pleural effusion                          |            |     |                |
| 6. | Examine for bleeding manifestation                     |            |     |                |
| 7. | Check for abdominal tenderness                         |            |     |                |
| 8. | Check for hepatomegaly                                 |            |     |                |
| 9. | Check for ascites                                      |            |     |                |

**D. Assess haemodynamic status**

|    |                                            | Done |     | Value | Remarks |
|----|--------------------------------------------|------|-----|-------|---------|
|    |                                            | Y=1  | N=2 |       |         |
| 1. | Skin color                                 |      |     |       |         |
| 2. | Cold/ warm extremities                     |      |     |       |         |
| 3. | Capillary filling time (normal <2 seconds) |      |     |       |         |
| 4. | Pulse rate                                 |      |     |       |         |
| 5. | Pulse volume                               |      |     |       |         |
| 6. | Blood pressure                             |      |     |       |         |
| 7. | Pulse pressure                             |      |     |       |         |

**E. Diagnosis /Notification**

|    |                                             | Documented |     | Please specify |
|----|---------------------------------------------|------------|-----|----------------|
|    |                                             | Y=1        | N=2 |                |
| 1. | Phase of illness                            |            |     |                |
|    | a. Febrile                                  |            |     |                |
|    | b. Deferversence                            |            |     |                |
|    | c. recovery                                 |            |     |                |
| 2. | Dengue without warning sign                 |            |     |                |
| 3. | Dengue with warning sign                    |            |     |                |
| 4. | Severe dengue                               |            |     |                |
|    | a. severe plasma leakage                    |            |     |                |
|    | b. severe bleeding                          |            |     |                |
|    | c. severe organ impairment                  |            |     |                |
| 5. | Notification within 24 hours from diagnosis |            |     |                |



**EMERGENCY DEPARTMENT**

**F. Initial management ED (follow Table 8 from CPG) – Please tick at Table 8 whenever appropriate**

|                      |                            | Documented<br>(Y=1,N=2) |    |          |    |          |    |
|----------------------|----------------------------|-------------------------|----|----------|----|----------|----|
|                      |                            | Febrile                 |    | Critical |    | Recovery |    |
|                      |                            | Yes                     | No | Yes      | No | Yes      | No |
| 1.                   | Investigation              |                         |    |          |    |          |    |
|                      | a. FBC & HCT               |                         |    |          |    |          |    |
|                      | b. Dengue Serology         |                         |    |          |    |          |    |
| 2.                   | Monitoring                 |                         |    |          |    |          |    |
|                      | a. Pink/ cyanosis          |                         |    |          |    |          |    |
|                      | b. Extremities (cold/warm) |                         |    |          |    |          |    |
|                      | c. Capillary refill time   |                         |    |          |    |          |    |
|                      | d. Pulse volume            |                         |    |          |    |          |    |
|                      | e. Pulse rate              |                         |    |          |    |          |    |
|                      | f. Blood pressure          |                         |    |          |    |          |    |
|                      | g. Pulse pressure          |                         |    |          |    |          |    |
|                      | h. Respiratory rate        |                         |    |          |    |          |    |
|                      | i. SpO2                    |                         |    |          |    |          |    |
|                      | j. warning sign assessment |                         |    |          |    |          |    |
| k. urine output      |                            |                         |    |          |    |          |    |
| 3.                   | Fluid management           |                         |    |          |    |          |    |
|                      | a. Bolus 20ml/kg           |                         |    |          |    |          |    |
|                      | b. Half bolus 10ml/kg      |                         |    |          |    |          |    |
|                      | c. 7 ml/kg regime          |                         |    |          |    |          |    |
|                      | d. 5 ml/kg regime          |                         |    |          |    |          |    |
|                      | e. 3 ml/kg regime          |                         |    |          |    |          |    |
|                      | f. 2 ml/kg regime          |                         |    |          |    |          |    |
| g. Blood transfusion |                            |                         |    |          |    |          |    |

**G. Follow through plan in ED**

|    |                             | Tick (✓) where appropriate | Please specify |
|----|-----------------------------|----------------------------|----------------|
| 1. | Discharge without follow up |                            |                |
| 2. | Discharge with follow up    |                            |                |
| 3. | Direct Admission            |                            |                |
| 4. | Medical referral            |                            |                |
|    | a. Discharge                |                            |                |
|    | b. Admit                    |                            |                |
| 5. | ICU referral                |                            |                |
| 6. | Death                       |                            |                |
| 1. | Complication                |                            |                |

**Table 8 : Parameters and Frequency of Monitoring According to Different Phases of Dengue Illness**

| Parameters for monitoring                                                                                                                                                                                                                                                                                                                     | Frequency of monitoring                             |                                                                                                                                                   |                                       |
|-----------------------------------------------------------------------------------------------------------------------------------------------------------------------------------------------------------------------------------------------------------------------------------------------------------------------------------------------|-----------------------------------------------------|---------------------------------------------------------------------------------------------------------------------------------------------------|---------------------------------------|
|                                                                                                                                                                                                                                                                                                                                               | Febrile phase                                       | Critical phase                                                                                                                                    | Recovery phase                        |
| <b>Clinical Parameters</b>                                                                                                                                                                                                                                                                                                                    |                                                     |                                                                                                                                                   |                                       |
| General well being<br>Appetite/ oral intake<br>Warning signs<br>Symptoms of bleeding<br>Neurological/ mental state                                                                                                                                                                                                                            | Daily or more frequently towards late febrile phase | At least twice a day and more frequently as indicated                                                                                             | Daily or more frequently as indicated |
| Haemodynamic status <ul style="list-style-type: none"> <li>• Pink/ cyanosis</li> <li>• Extremities (cold/warm)</li> <li>• Capillary refill time</li> <li>• Pulse volume</li> <li>• PR</li> <li>• BP</li> <li>• Pulse pressure</li> </ul> Respiratory status <ul style="list-style-type: none"> <li>• RR</li> <li>• SpO<sub>2</sub></li> </ul> | 4-6 hourly depending on clinical status             | 2-4 hourly depending on clinical status<br><br><b>In shock</b><br>Every 15-30 minutes till stable then 1-2 hourly                                 | 4-6 hourly                            |
| Signs of bleeding, abdominal tenderness, ascites and pleural effusion                                                                                                                                                                                                                                                                         | Daily or more frequently towards late febrile phase | At least twice a day and more frequently as indicated                                                                                             | Daily or more frequently as indicated |
| Urine output                                                                                                                                                                                                                                                                                                                                  | 4 hourly                                            | 2-4 hourly<br><b>In shock</b><br>Hourly                                                                                                           | 4-6 hourly                            |
| Parameters for monitoring                                                                                                                                                                                                                                                                                                                     | Frequency of monitoring                             |                                                                                                                                                   |                                       |
|                                                                                                                                                                                                                                                                                                                                               | Febrile phase                                       | Critical phase                                                                                                                                    | Recovery phase                        |
| <b>Clinical Parameters</b>                                                                                                                                                                                                                                                                                                                    |                                                     |                                                                                                                                                   |                                       |
| FBC + HCT                                                                                                                                                                                                                                                                                                                                     | Daily or more frequently if indicated               | 4-12 hourly depending on clinical status<br><br><b>In shock</b><br>Repeated before and after each attempt of fluid resuscitation and as indicated | Daily                                 |
| BUSE/ Creatinine<br>LFT<br>RBS<br>Coagulation profile<br>HCO <sub>3</sub> / TCO <sub>2</sub> / Lactate                                                                                                                                                                                                                                        | As indicated                                        | At least daily or more frequently as indicated<br><br><b>In shock</b><br>Crucial to monitor acid-base balance/ ABG closely                        | As indicated                          |

Adapted from 2, Level 9; 65, Level 9

Patient ID : 

|  |  |  |
|--|--|--|
|  |  |  |
|--|--|--|

MEDICAL TEAM

**Part IV: IN-PATIENT Management of Dengue infection (MEDICAL TEAM)**

DATE:

**A. History (FIRST REVIEW)**

|    |                                                           | Documented |     | Please specify |
|----|-----------------------------------------------------------|------------|-----|----------------|
|    |                                                           | Y=1        | N=2 |                |
| 1. | Date of onset of fever/ illness                           |            |     |                |
| 2. | Oral intake                                               |            |     |                |
| 3. | Diarrhea                                                  |            |     |                |
| 4. | Bleeding                                                  |            |     |                |
| 5. | Change in mental state/seizure/dizziness                  |            |     |                |
| 6. | Urine output (frequency, volume and time of last voiding) |            |     |                |

**B. Assess for warning sign (FIRST REVIEW)**

|    |                                                                         | Documented |     | Please specify |
|----|-------------------------------------------------------------------------|------------|-----|----------------|
|    |                                                                         | Y=1        | N=2 |                |
| 1. | Abdominal pain or tenderness                                            |            |     |                |
| 2. | Persistent vomiting                                                     |            |     |                |
| 3. | Clinical fluid accumulation (pleural effusion, ascites)                 |            |     |                |
| 4. | Mucosal bleed                                                           |            |     |                |
| 5. | Restlessness or lethargy                                                |            |     |                |
| 6. | Tender enlarged liver                                                   |            |     |                |
| 7. | Laboratory : Increase in HCT concurrent with rapid decrease in platelet |            |     |                |

**C. Physical examination (FIRST REVIEW)**

|    |                                                         | Documented |     | Please specify |
|----|---------------------------------------------------------|------------|-----|----------------|
|    |                                                         | Y=1        | N=2 |                |
| 1. | Assess mental state and Glasgow Coma Scale (GCS) score  |            |     |                |
| 2. | Assess hydration status                                 |            |     |                |
| 3. | Look out for tachypnea/RR / Look out acidotic breathing |            |     |                |
| 4. | Look out for pleural effusion                           |            |     |                |
| 5. | Examine for bleeding manifestation                      |            |     |                |
| 6. | Check for abdominal tenderness                          |            |     |                |
| 7. | Check for hepatomegaly                                  |            |     |                |
| 8. | Check for ascites                                       |            |     |                |

**MEDICAL TEAM**

**D. Assess haemodynamic status (FIRST REVIEW)**

|    |                                            | Documented |     | Value | Remarks |
|----|--------------------------------------------|------------|-----|-------|---------|
|    |                                            | Y=1        | N=2 |       |         |
| 1. | Skin color                                 |            |     |       |         |
| 2. | Cold/ warm extremities                     |            |     |       |         |
| 3. | Capillary filling time (normal <2 seconds) |            |     |       |         |
| 4. | Pulse rate                                 |            |     |       |         |
| 5. | Pulse volume                               |            |     |       |         |
| 6. | Blood pressure                             |            |     |       |         |
| 7. | Pulse pressure                             |            |     |       |         |

**E. Diagnosis / Notification (FIRST REVIEW)**

|    |                                   | Done |     | Please specify: |
|----|-----------------------------------|------|-----|-----------------|
|    |                                   | Y=1  | N=2 |                 |
| 1. | <b>Phase of illness</b>           |      |     |                 |
|    | a. Febrile                        |      |     |                 |
|    | b. Defervescence                  |      |     |                 |
|    | c. recovery                       |      |     |                 |
| 2. | Dengue without warning sign       |      |     |                 |
| 3. | Dengue with warning sign          |      |     |                 |
| 4. | Severe dengue                     |      |     |                 |
|    | a. Severe plasma leakage          |      |     |                 |
|    | b. Severe bleeding                |      |     |                 |
|    | c. Severe organ impairment        |      |     |                 |
| 5. | Notification done within 24 hours |      |     |                 |

**F. Ward management (follow Table 8)**

|    |                            | Documented (Y=1,N=2) |    |          |    |          |    |
|----|----------------------------|----------------------|----|----------|----|----------|----|
|    |                            | Febrile              |    | Critical |    | Recovery |    |
|    |                            | Yes                  | No | Yes      | No | Yes      | No |
| 1. | Investigation              |                      |    |          |    |          |    |
|    | a. FBC & HCT               |                      |    |          |    |          |    |
|    | b. Dengue serology         |                      |    |          |    |          |    |
| 2. | Monitoring                 |                      |    |          |    |          |    |
|    | a. Pink/ cyanosis          |                      |    |          |    |          |    |
|    | b. Extremities (cold/warm) |                      |    |          |    |          |    |
|    | c. Capillary refill time   |                      |    |          |    |          |    |
|    | d. Pulse volume            |                      |    |          |    |          |    |
|    | e. PR                      |                      |    |          |    |          |    |
|    | f. BP                      |                      |    |          |    |          |    |
|    | g. Pulse pressure          |                      |    |          |    |          |    |
|    | h. RR                      |                      |    |          |    |          |    |
|    | i. SpO2                    |                      |    |          |    |          |    |
|    | j. Warning sign assessment |                      |    |          |    |          |    |
|    | k. Urine output            |                      |    |          |    |          |    |

**Table 8 : Parameters and Frequency of Monitoring According to Different Phases of Dengue Illness**

| Parameters for monitoring                                                                                                                                                                                                                                                   | Frequency of monitoring                             |                                                                                                                                                   |                                       |
|-----------------------------------------------------------------------------------------------------------------------------------------------------------------------------------------------------------------------------------------------------------------------------|-----------------------------------------------------|---------------------------------------------------------------------------------------------------------------------------------------------------|---------------------------------------|
|                                                                                                                                                                                                                                                                             | Febrile phase                                       | Critical phase                                                                                                                                    | Recovery phase                        |
| <b>Clinical Parameters</b>                                                                                                                                                                                                                                                  |                                                     |                                                                                                                                                   |                                       |
| General well being<br>Appetite/ oral intake<br>Warning signs<br>Symptoms of bleeding<br>Neurological/ mental state                                                                                                                                                          | Daily or more frequently towards late febrile phase | At least twice a day and more frequently as indicated                                                                                             | Daily or more frequently as indicated |
| Haemodynamic status<br>• <i>Pink/ cyanosis</i><br>• <i>Extremities (cold/warm)</i><br>• <i>Capillary refill time</i><br>• <i>Pulse volume</i><br>• <i>PR</i><br>• <i>BP</i><br>• <i>Pulse pressure</i><br><br>Respiratory status<br>• <i>RR</i><br>• <i>SpO<sub>2</sub></i> | 4-6 hourly depending on clinical status             | 2-4 hourly depending on clinical status<br><br><b>In shock</b><br>Every 15-30 minutes till stable then 1-2 hourly                                 | 4-6 hourly                            |
| Signs of bleeding, abdominal tenderness, ascites and pleural effusion                                                                                                                                                                                                       | Daily or more frequently towards late febrile phase | At least twice a day and more frequently as indicated                                                                                             | Daily or more frequently as indicated |
| Urine output                                                                                                                                                                                                                                                                | 4 hourly                                            | 2-4 hourly<br><b>In shock</b><br>Hourly                                                                                                           | 4-6 hourly                            |
| Parameters for monitoring                                                                                                                                                                                                                                                   | Frequency of monitoring                             |                                                                                                                                                   |                                       |
|                                                                                                                                                                                                                                                                             | Febrile phase                                       | Critical phase                                                                                                                                    | Recovery phase                        |
| <b>Clinical Parameters</b>                                                                                                                                                                                                                                                  |                                                     |                                                                                                                                                   |                                       |
| FBC + HCT                                                                                                                                                                                                                                                                   | Daily or more frequently if indicated               | 4-12 hourly depending on clinical status<br><br><b>In shock</b><br>Repeated before and after each attempt of fluid resuscitation and as indicated | Daily                                 |
| BUSE/ Creatinine<br>LFT<br>RBS<br>Coagulation profile<br>HCO <sub>3</sub> / TCO <sub>2</sub> / Lactate                                                                                                                                                                      | As indicated                                        | At least daily or more frequently as indicated<br><br><b>In shock</b><br>Crucial to monitor acid-base balance/ ABG closely                        | As indicated                          |

Adapted from 2, Level 9; 65, Level 9

**MEDICAL TEAM**

**G. Overall fluid management (Tick where appropriate)**

|    |                    | DF +<br>w/out WS | DF + WS | DF<br>Compensated<br>Shock | DF<br>Decompensated<br>Shock | Severe Dengue |
|----|--------------------|------------------|---------|----------------------------|------------------------------|---------------|
| a. | bolus 20ml/kg      |                  |         |                            |                              |               |
| b. | half bolus 10ml/kg |                  |         |                            |                              |               |
| c. | 7 ml/kg regime     |                  |         |                            |                              |               |
| d. | 5 ml/kg regime     |                  |         |                            |                              |               |
| e. | 3 ml/kg regime     |                  |         |                            |                              |               |
| f. | 2 ml/kg regime     |                  |         |                            |                              |               |
| g. | maintainence       |                  |         |                            |                              |               |
| h. | blood transfusion  |                  |         |                            |                              |               |
| i. | other regime       |                  |         |                            |                              |               |

**H. Follow through plan by Medical Team**

|    |                                              | Tick (✓) where<br>appropriate | Please specify |
|----|----------------------------------------------|-------------------------------|----------------|
| 1. | Discharge without follow up                  |                               |                |
| 2. | Discharge with follow up                     |                               |                |
| 4. | Transfer to ICU (Please<br>complete part I ) |                               |                |
| 5. | Care by medical team                         |                               |                |
| 6. | Death                                        |                               |                |
| 7. | Complication:                                |                               |                |
|    | a. Thrombophlebitis                          |                               |                |
|    | b. Fluid overload                            |                               |                |
|    | c. Hospital Acquired<br>Pneumonia            |                               |                |
|    | d. Other                                     |                               |                |

**MEDICAL TEAM**

**I. PRE TRANSFER TO INTENSIVE CARE UNIT ASSESSMENT( when applicable)**

**(i) *History (PRE ICU TRANSFER)***

|    |                                                           | Documented |     | Please specify |
|----|-----------------------------------------------------------|------------|-----|----------------|
|    |                                                           | Y=1        | N=2 |                |
| 1. | Date of onset of fever/ illness                           |            |     |                |
| 2. | Oral intake                                               |            |     |                |
| 3. | Diarrhea                                                  |            |     |                |
| 4. | Bleeding                                                  |            |     |                |
| 5. | Change in mental state/seizure/dizziness                  |            |     |                |
| 6. | Urine output (frequency, volume and time of last voiding) |            |     |                |

**(ii) *Assess for warning sign (PRE ICU TRANSFER)***

|    |                                                                         | Documented |     | Please specify |
|----|-------------------------------------------------------------------------|------------|-----|----------------|
|    |                                                                         | Y=1        | N=2 |                |
| 1. | Abdominal pain or tenderness                                            |            |     |                |
| 2. | Persistent vomiting                                                     |            |     |                |
| 3. | Clinical fluid accumulation (pleural effusion, ascites)                 |            |     |                |
| 4. | Mucosal bleed                                                           |            |     |                |
| 5. | Restlessness or lethargy                                                |            |     |                |
| 6. | Tender enlarged liver                                                   |            |     |                |
| 7. | Laboratory : Increase in HCT concurrent with rapid decrease in platelet |            |     |                |

**(iii) *Physical examination (PRE ICU TRANSFER)***

|    |                                                         | Documented |     | Please specify |
|----|---------------------------------------------------------|------------|-----|----------------|
|    |                                                         | Y=1        | N=2 |                |
| 1. | Assess mental state and Glasgow Coma Scale (GCS) score  |            |     |                |
| 2. | Assess hydration status                                 |            |     |                |
| 3. | Look out for tachypnea/RR / Look out acidotic breathing |            |     |                |
| 4. | Look out for pleural effusion                           |            |     |                |
| 5. | Examine for bleeding manifestation                      |            |     |                |
| 6. | Check for abdominal tenderness                          |            |     |                |
| 7. | Check for hepatomegaly                                  |            |     |                |
| 8. | Check for ascites                                       |            |     |                |

**MEDICAL TEAM**

**(iv) Assess haemodynamic status (PRE ICU TRANSFER)**

|    |                                            | Documented |     | Value |
|----|--------------------------------------------|------------|-----|-------|
|    |                                            | Y=1        | N=2 |       |
| 1. | Skin color                                 |            |     |       |
| 2. | Cold/ warm extremities                     |            |     |       |
| 3. | Capillary filling time (normal <2 seconds) |            |     |       |
| 4. | Pulse rate                                 |            |     |       |
| 5. | Pulse volume                               |            |     |       |
| 6. | Blood pressure                             |            |     |       |
| 7. | Pulse pressure                             |            |     |       |

**(v) Diagnosis (PRE ICU TRANSFER)**

|    |                                   | Done |     | Please specify: |
|----|-----------------------------------|------|-----|-----------------|
|    |                                   | Y=1  | N=2 |                 |
| 1. | Phase of illness                  |      |     |                 |
|    | a. Febrile                        |      |     |                 |
|    | b. Defervescence                  |      |     |                 |
|    | c. Recovery                       |      |     |                 |
| 2. | Dengue without warning sign       |      |     |                 |
| 3. | Dengue with warning sign          |      |     |                 |
| 4. | Severe dengue                     |      |     |                 |
|    | a. severe plasma leakage          |      |     |                 |
|    | b. severe bleeding                |      |     |                 |
|    | c. severe organ impairment        |      |     |                 |
| 5. | Notification done within 24 hours |      |     |                 |

**(vi) PRE ICU TRANSFER management (follow Table 8)**

|    |                            | Documented (Y=1,N=2) |    |          |    |          |    |
|----|----------------------------|----------------------|----|----------|----|----------|----|
|    |                            | Febrile              |    | Critical |    | Recovery |    |
|    |                            | Yes                  | No | Yes      | No | Yes      | No |
| 1. | Investigation              |                      |    |          |    |          |    |
|    | a. FBC & HCT               |                      |    |          |    |          |    |
|    | b. Dengue serology         |                      |    |          |    |          |    |
| 2. | Monitoring                 |                      |    |          |    |          |    |
|    | a. Pink/ cyanosis          |                      |    |          |    |          |    |
|    | b. Extremities (cold/warm) |                      |    |          |    |          |    |
|    | c. Capillary refill time   |                      |    |          |    |          |    |
|    | d. Pulse volume            |                      |    |          |    |          |    |
|    | e. PR                      |                      |    |          |    |          |    |
|    | f. BP                      |                      |    |          |    |          |    |
|    | g. Pulse pressure          |                      |    |          |    |          |    |
|    | h. RR                      |                      |    |          |    |          |    |
|    | i. SpO2                    |                      |    |          |    |          |    |
|    | j. warning sign assessment |                      |    |          |    |          |    |
|    | k. urine output            |                      |    |          |    |          |    |



MEDICAL TEAM

(vii) Overall fluid management (PRE ICU) (Tick where appropriate)

|    |                       | <b>DF +<br/>w/out<br/>WS</b> | <b>DF +<br/>WS</b> | <b>DF<br/>compensated<br/>Shock</b> | <b>DF<br/>decompensated<br/>shock</b> | <b>Severe<br/>Dengue</b> |
|----|-----------------------|------------------------------|--------------------|-------------------------------------|---------------------------------------|--------------------------|
| a. | bolus 20ml/kg         |                              |                    |                                     |                                       |                          |
| b. | half bolus<br>10ml/kg |                              |                    |                                     |                                       |                          |
| c. | 7 ml/kg regime        |                              |                    |                                     |                                       |                          |
| d. | 5 ml/kg regime        |                              |                    |                                     |                                       |                          |
| e. | 3 ml/kg regime        |                              |                    |                                     |                                       |                          |
| f. | 2 ml/kg regime        |                              |                    |                                     |                                       |                          |
| g. | maintainence          |                              |                    |                                     |                                       |                          |
| h. | blood transfusion     |                              |                    |                                     |                                       |                          |
| i. | other regime          |                              |                    |                                     |                                       |                          |

**Table 8 : Parameters and Frequency of Monitoring According to Different Phases of Dengue Illness**

| Parameters for monitoring                                                                                                                                    | Frequency of monitoring                             |                                                                                                                                                   |                                       |
|--------------------------------------------------------------------------------------------------------------------------------------------------------------|-----------------------------------------------------|---------------------------------------------------------------------------------------------------------------------------------------------------|---------------------------------------|
|                                                                                                                                                              | Febrile phase                                       | Critical phase                                                                                                                                    | Recovery phase                        |
| <b>Clinical Parameters</b>                                                                                                                                   |                                                     |                                                                                                                                                   |                                       |
| General well being<br>Appetite/ oral intake<br>Warning signs<br>Symptoms of bleeding<br>Neurological/ mental state                                           | Daily or more frequently towards late febrile phase | At least twice a day and more frequently as indicated                                                                                             | Daily or more frequently as indicated |
| <b>Haemodynamic status</b><br>• Pink/ cyanosis<br>• Extremities (cold/warm)<br>• Capillary refill time<br>• Pulse volume<br>• PR<br>• BP<br>• Pulse pressure | 4-6 hourly depending on clinical status             | 2-4 hourly depending on clinical status<br><br><b>In shock</b><br>Every 15-30 minutes till stable then 1-2 hourly                                 | 4-6 hourly                            |
| <b>Respiratory status</b><br>• RR<br>• SpO <sub>2</sub>                                                                                                      |                                                     |                                                                                                                                                   |                                       |
| <b>Signs of bleeding, abdominal tenderness, ascites and pleural effusion</b>                                                                                 | Daily or more frequently towards late febrile phase | At least twice a day and more frequently as indicated                                                                                             | Daily or more frequently as indicated |
| <b>Urine output</b>                                                                                                                                          | 4 hourly                                            | 2-4 hourly<br><b>In shock</b><br>Hourly                                                                                                           | 4-6 hourly                            |
| Parameters for monitoring                                                                                                                                    | Frequency of monitoring                             |                                                                                                                                                   |                                       |
|                                                                                                                                                              | Febrile phase                                       | Critical phase                                                                                                                                    | Recovery phase                        |
| <b>Clinical Parameters</b>                                                                                                                                   |                                                     |                                                                                                                                                   |                                       |
| <b>FBC + HCT</b>                                                                                                                                             | Daily or more frequently if indicated               | 4-12 hourly depending on clinical status<br><br><b>In shock</b><br>Repeated before and after each attempt of fluid resuscitation and as indicated | Daily                                 |
| <b>BUSE/ Creatinine<br/>LFT<br/>RBS<br/>Coagulation profile<br/>HCO<sub>3</sub>/ TCO<sub>2</sub>/ Lactate</b>                                                | As indicated                                        | At least daily or more frequently as indicated<br><br><b>In shock</b><br>Crucial to monitor acid-base balance/ ABG closely                        | As indicated                          |

Adapted from <sup>2, Level 9; 65, Level 9</sup>

Patient ID :

INTENSIVE CARE UNIT

**Part V: IN-PATIENT Management of Dengue infection by ICU TEAM (when applicable)**

**DATE:**

**A. History (FIRST REVIEW)**

|    |                                                           | Documented |     | Please specify |
|----|-----------------------------------------------------------|------------|-----|----------------|
|    |                                                           | Y=1        | N=2 |                |
| 1. | Date of onset of fever/ illness                           |            |     |                |
| 2. | Oral intake                                               |            |     |                |
| 3. | Diarrhea                                                  |            |     |                |
| 4. | Bleeding                                                  |            |     |                |
| 5. | Change in mental state/seizure/dizziness                  |            |     |                |
| 6. | Urine output (frequency, volume and time of last voiding) |            |     |                |

**B. Assess for warning sign (FIRST REVIEW)**

|    |                                                                         | Documented |     | Please specify |
|----|-------------------------------------------------------------------------|------------|-----|----------------|
|    |                                                                         | Y=1        | N=2 |                |
| 1. | Abdominal pain or tenderness                                            |            |     |                |
| 2. | Persistent vomiting                                                     |            |     |                |
| 3. | Clinical fluid accumulation (pleural effusion, ascites)                 |            |     |                |
| 4. | Mucosal bleed                                                           |            |     |                |
| 5. | Restlessness or lethargy                                                |            |     |                |
| 6. | Tender enlarged liver                                                   |            |     |                |
| 7. | Laboratory : Increase in HCT concurrent with rapid decrease in platelet |            |     |                |

**C. Physical examination (FIRST REVIEW)**

|    |                                                         | Documented |     | Please specify |
|----|---------------------------------------------------------|------------|-----|----------------|
|    |                                                         | Y=1        | N=2 |                |
| 1. | Assess mental state and Glasgow Coma Scale (GCS) score  |            |     |                |
| 2. | Assess hydration status                                 |            |     |                |
| 3. | Look out for tachypnea/RR / Look out acidotic breathing |            |     |                |
| 4. | Look out for pleural effusion                           |            |     |                |
| 5. | Examine for bleeding manifestation                      |            |     |                |
| 6. | Check for abdominal tenderness                          |            |     |                |
| 7. | Check for hepatomegaly                                  |            |     |                |
| 8. | Check for ascites                                       |            |     |                |

**INTENSIVE CARE UNIT**

**D. Assess haemodynamic status (FIRST REVIEW)**

|    |                                               | Documented |     | Value |
|----|-----------------------------------------------|------------|-----|-------|
|    |                                               | Y=1        | N=2 |       |
| 1. | Skin color                                    |            |     |       |
| 2. | Cold/ warm extremities                        |            |     |       |
| 3. | Capillary filling time<br>(normal <2 seconds) |            |     |       |
| 4. | Pulse rate                                    |            |     |       |
| 5. | Pulse volume                                  |            |     |       |
| 6. | Blood pressure                                |            |     |       |
| 7. | Pulse pressure                                |            |     |       |

**E. Diagnosis / Notification (FIRST REVIEW)**

|    |                                                                                               | Done |     | Please specify |
|----|-----------------------------------------------------------------------------------------------|------|-----|----------------|
|    |                                                                                               | Y=1  | N=2 |                |
| 1. | Phase of illness<br>a. Febrile<br>b. Defervescence<br>c. recovery                             |      |     |                |
| 2. | Dengue without warning sign                                                                   |      |     |                |
| 3. | Dengue with warning sign                                                                      |      |     |                |
| 4. | Severe dengue<br>a. severe plasma leakage<br>b. severe bleeding<br>c. severe organ impairment |      |     |                |
| 5. | Notification done within 24 hours                                                             |      |     |                |

**F. Ward management (follow Table 8)**

|    |                               | Documented<br>(Y=1,N=2) |    |          |    |          |    |
|----|-------------------------------|-------------------------|----|----------|----|----------|----|
|    |                               | Febrile                 |    | Critical |    | Recovery |    |
|    |                               | Yes                     | No | Yes      | No | Yes      | No |
| 1. | Investigation                 |                         |    |          |    |          |    |
|    | a. FBC & HCT                  |                         |    |          |    |          |    |
|    | b. Dengue serology            |                         |    |          |    |          |    |
| 2. | Monitoring                    |                         |    |          |    |          |    |
|    | a. Pink/ cyanosis             |                         |    |          |    |          |    |
|    | b. Extremities<br>(cold/warm) |                         |    |          |    |          |    |
|    | c. Capillary refill time      |                         |    |          |    |          |    |
|    | d. Pulse volume               |                         |    |          |    |          |    |
|    | e. PR                         |                         |    |          |    |          |    |
|    | f. BP                         |                         |    |          |    |          |    |
|    | g. Pulse pressure             |                         |    |          |    |          |    |
|    | h. RR                         |                         |    |          |    |          |    |
|    | i. SpO2                       |                         |    |          |    |          |    |
|    | j. warning sign<br>assessment |                         |    |          |    |          |    |
|    | k. urine output               |                         |    |          |    |          |    |

**INTENSIVE CARE UNIT**

**G. Overall fluid management (Tick where appropriate )**

|                       | <b>DF +<br/>w/out<br/>WS</b> | <b>DF + WS</b> | <b>DF<br/>compensated<br/>Shock</b> | <b>DF<br/>decompensated<br/>shock</b> | <b>Severe<br/>Dengue</b> |
|-----------------------|------------------------------|----------------|-------------------------------------|---------------------------------------|--------------------------|
| a. bolus 20ml/kg      |                              |                |                                     |                                       |                          |
| b. half bolus 10ml/kg |                              |                |                                     |                                       |                          |
| c. 7 ml/kg regime     |                              |                |                                     |                                       |                          |
| d. 5 ml/kg regime     |                              |                |                                     |                                       |                          |
| e. 3 ml/kg regime     |                              |                |                                     |                                       |                          |
| f. 2 ml/kg regime     |                              |                |                                     |                                       |                          |
| g. maintenance        |                              |                |                                     |                                       |                          |
| h. blood transfusion  |                              |                |                                     |                                       |                          |
| i. other regime       |                              |                |                                     |                                       |                          |

**H. Follow through plan by ICU Team**

|    |                                                       | Tick (✓) where appropriate | Please specify |
|----|-------------------------------------------------------|----------------------------|----------------|
| 4. | Transfer to Medical team<br>(please complete part I ) |                            |                |
| 5. | Transfer to other team                                |                            |                |
| 6. | Death                                                 |                            |                |
| 7. | Complication:                                         |                            |                |
|    | a. Thrombophlebitis                                   |                            |                |
|    | b. Fluid overload                                     |                            |                |
|    | c. Hospital Acquired<br>Pneumonia                     |                            |                |
|    | d. Other                                              |                            |                |

**Table 8 : Parameters and Frequency of Monitoring According to Different Phases of Dengue Illness**

| Parameters for monitoring                                                                                                                                                                                                                                                                 | Frequency of monitoring                             |                                                                                                                                                   |                                       |
|-------------------------------------------------------------------------------------------------------------------------------------------------------------------------------------------------------------------------------------------------------------------------------------------|-----------------------------------------------------|---------------------------------------------------------------------------------------------------------------------------------------------------|---------------------------------------|
|                                                                                                                                                                                                                                                                                           | Febrile phase                                       | Critical phase                                                                                                                                    | Recovery phase                        |
| <b>Clinical Parameters</b>                                                                                                                                                                                                                                                                |                                                     |                                                                                                                                                   |                                       |
| General well being<br>Appetite/ oral intake<br>Warning signs<br>Symptoms of bleeding<br>Neurological/ mental state                                                                                                                                                                        | Daily or more frequently towards late febrile phase | At least twice a day and more frequently as indicated                                                                                             | Daily or more frequently as indicated |
| <b>Haemodynamic status</b><br>• <i>Pink/ cyanosis</i><br>• <i>Extremities (cold/warm)</i><br>• <i>Capillary refill time</i><br>• <i>Pulse volume</i><br>• <i>PR</i><br>• <i>BP</i><br>• <i>Pulse pressure</i><br><br><b>Respiratory status</b><br>• <i>RR</i><br>• <i>SpO<sub>2</sub></i> | 4-6 hourly depending on clinical status             | 2-4 hourly depending on clinical status<br><br><b>In shock</b><br>Every 15-30 minutes till stable then 1-2 hourly                                 | 4-6 hourly                            |
| <b>Signs of bleeding, abdominal tenderness, ascites and pleural effusion</b>                                                                                                                                                                                                              | Daily or more frequently towards late febrile phase | At least twice a day and more frequently as indicated                                                                                             | Daily or more frequently as indicated |
| <b>Urine output</b>                                                                                                                                                                                                                                                                       | 4 hourly                                            | 2-4 hourly<br><b>In shock</b><br>Hourly                                                                                                           | 4-6 hourly                            |
| Parameters for monitoring                                                                                                                                                                                                                                                                 | Frequency of monitoring                             |                                                                                                                                                   |                                       |
|                                                                                                                                                                                                                                                                                           | Febrile phase                                       | Critical phase                                                                                                                                    | Recovery phase                        |
| <b>Clinical Parameters</b>                                                                                                                                                                                                                                                                |                                                     |                                                                                                                                                   |                                       |
| <b>FBC + HCT</b>                                                                                                                                                                                                                                                                          | Daily or more frequently if indicated               | 4-12 hourly depending on clinical status<br><br><b>In shock</b><br>Repeated before and after each attempt of fluid resuscitation and as indicated | Daily                                 |
| <b>BUSE/ Creatinine<br/>LFT<br/>RBS<br/>Coagulation profile<br/>HCO<sub>3</sub>/ TCO<sub>2</sub>/ Lactate</b>                                                                                                                                                                             | As indicated                                        | At least daily or more frequently as indicated<br><br><b>In shock</b><br>Crucial to monitor acid-base balance/ ABG closely                        | As indicated                          |

Adapted from <sup>2, Level 9</sup>; <sup>65, Level 9</sup>

**INTENSIVE CARE UNIT**

**I. PRE TRANSFER BACK TO MEDICAL WARD**

**(i) *History (PRE TRANSFER BACK TO MEDICAL)***

|    |                                                           | Documented |     | Please specify |
|----|-----------------------------------------------------------|------------|-----|----------------|
|    |                                                           | Y=1        | N=2 |                |
| 1. | Date of onset of fever/ illness                           |            |     |                |
| 2. | Oral intake                                               |            |     |                |
| 3. | Diarrhea                                                  |            |     |                |
| 4. | Bleeding                                                  |            |     |                |
| 5. | Change in mental state/seizure/dizziness                  |            |     |                |
| 6. | Urine output (frequency, volume and time of last voiding) |            |     |                |

**(ii) *Assess for warning sign(PRE TRANSFER BACK TO MEDICAL)***

|    |                                                                         | Documented |     | Please specify |
|----|-------------------------------------------------------------------------|------------|-----|----------------|
|    |                                                                         | Y=1        | N=2 |                |
| 1. | Abdominal pain or tenderness                                            |            |     |                |
| 2. | Persistent vomiting                                                     |            |     |                |
| 3. | Clinical fluid accumulation (pleural effusion, ascites)                 |            |     |                |
| 4. | Mucosal bleed                                                           |            |     |                |
| 5. | Restlessness or lethargy                                                |            |     |                |
| 6. | Tender enlarged liver                                                   |            |     |                |
| 7. | Laboratory : Increase in HCT concurrent with rapid decrease in platelet |            |     |                |

**(iii) *Physical examination(PRE TRANSFER BACK TO MEDICAL)***

|    |                                                         | Documented |     | Please specify |
|----|---------------------------------------------------------|------------|-----|----------------|
|    |                                                         | Y=1        | N=2 |                |
| 1. | Assess mental state and Glasgow Coma Scale (GCS) score  |            |     |                |
| 2. | Assess hydration status                                 |            |     |                |
| 3. | Look out for tachypnea/RR / Look out acidotic breathing |            |     |                |
| 4. | Look out for pleural effusion                           |            |     |                |
| 5. | Examine for bleeding manifestation                      |            |     |                |
| 6. | Check for abdominal tenderness                          |            |     |                |
| 7. | Check for hepatomegaly                                  |            |     |                |
| 8. | Check for ascites                                       |            |     |                |

**INTENSIVE CARE UNIT**

**(iv) Assess haemodynamic status(PRE TRANSFER BACK TO MEDICAL)**

|    |                                            | Documented |     | Value |
|----|--------------------------------------------|------------|-----|-------|
|    |                                            | Y=1        | N=2 |       |
| 1. | Skin colour                                |            |     |       |
| 2. | Cold/ warm extremities                     |            |     |       |
| 3. | Capillary filling time (normal <2 seconds) |            |     |       |
| 4. | Pulse rate                                 |            |     |       |
| 5. | Pulse volume                               |            |     |       |
| 6. | Blood pressure                             |            |     |       |
| 7. | Pulse pressure                             |            |     |       |

**(v) Diagnosis(PRE TRANSFER BACK TO MEDICAL)**

|    |                                   | Done |     | Please specify: |
|----|-----------------------------------|------|-----|-----------------|
|    |                                   | Y=1  | N=2 |                 |
| 1. | Phase of illness                  |      |     |                 |
|    | a. Febrile                        |      |     |                 |
|    | b. Defervescence                  |      |     |                 |
|    | c. recovery                       |      |     |                 |
| 2. | Dengue without warning sign       |      |     |                 |
| 3. | Dengue with warning sign          |      |     |                 |
| 4. | Severe dengue                     |      |     |                 |
|    | a. severe plasma leakage          |      |     |                 |
|    | b. severe bleeding                |      |     |                 |
|    | c. severe organ impairment        |      |     |                 |
| 5. | Notification done within 24 hours |      |     |                 |

**(vi) PRE TRANSFER BACK TO MEDICAL management (follow Table 8)**

|    |                            | Documented (Y=1,N=2) |    |          |    |          |    |
|----|----------------------------|----------------------|----|----------|----|----------|----|
|    |                            | Febrile              |    | Critical |    | Recovery |    |
|    |                            | Yes                  | No | Yes      | No | Yes      | No |
| 1. | Investigation              |                      |    |          |    |          |    |
|    | a. FBC & HCT               |                      |    |          |    |          |    |
|    | b. Dengue serology         |                      |    |          |    |          |    |
| 2. | Monitoring                 |                      |    |          |    |          |    |
|    | a. Pink/ cyanosis          |                      |    |          |    |          |    |
|    | b. Extremities (cold/warm) |                      |    |          |    |          |    |
|    | c. Capillary refill time   |                      |    |          |    |          |    |
|    | d. Pulse volume            |                      |    |          |    |          |    |
|    | e. PR                      |                      |    |          |    |          |    |
|    | f. BP                      |                      |    |          |    |          |    |
|    | g. Pulse pressure          |                      |    |          |    |          |    |
|    | h. RR                      |                      |    |          |    |          |    |
|    | i. SpO2                    |                      |    |          |    |          |    |
|    | j. warning sign assessment |                      |    |          |    |          |    |
|    | k. urine output            |                      |    |          |    |          |    |



**Table 8 : Parameters and Frequency of Monitoring According to Different Phases of Dengue Illness**

| Parameters for monitoring                                                                                                                                                                                                                                                                                                                                   | Frequency of monitoring                             |                                                                                                                                                   |                                       |
|-------------------------------------------------------------------------------------------------------------------------------------------------------------------------------------------------------------------------------------------------------------------------------------------------------------------------------------------------------------|-----------------------------------------------------|---------------------------------------------------------------------------------------------------------------------------------------------------|---------------------------------------|
|                                                                                                                                                                                                                                                                                                                                                             | Febrile phase                                       | Critical phase                                                                                                                                    | Recovery phase                        |
| <b>Clinical Parameters</b>                                                                                                                                                                                                                                                                                                                                  |                                                     |                                                                                                                                                   |                                       |
| General well being<br>Appetite/ oral intake<br>Warning signs<br>Symptoms of bleeding<br>Neurological/ mental state                                                                                                                                                                                                                                          | Daily or more frequently towards late febrile phase | At least twice a day and more frequently as indicated                                                                                             | Daily or more frequently as indicated |
| <b>Haemodynamic status</b> <ul style="list-style-type: none"> <li>• Pink/ cyanosis</li> <li>• Extremities (cold/warm)</li> <li>• Capillary refill time</li> <li>• Pulse volume</li> <li>• PR</li> <li>• BP</li> <li>• Pulse pressure</li> </ul> <b>Respiratory status</b> <ul style="list-style-type: none"> <li>• RR</li> <li>• SpO<sub>2</sub></li> </ul> | 4-6 hourly depending on clinical status             | 2-4 hourly depending on clinical status<br><br><b>In shock</b><br>Every 15-30 minutes till stable then 1-2 hourly                                 | 4-6 hourly                            |
| Signs of bleeding, abdominal tenderness, ascites and pleural effusion                                                                                                                                                                                                                                                                                       | Daily or more frequently towards late febrile phase | At least twice a day and more frequently as indicated                                                                                             | Daily or more frequently as indicated |
| Urine output                                                                                                                                                                                                                                                                                                                                                | 4 hourly                                            | 2-4 hourly<br><b>In shock</b><br>Hourly                                                                                                           | 4-6 hourly                            |
| Parameters for monitoring                                                                                                                                                                                                                                                                                                                                   | Frequency of monitoring                             |                                                                                                                                                   |                                       |
|                                                                                                                                                                                                                                                                                                                                                             | Febrile phase                                       | Critical phase                                                                                                                                    | Recovery phase                        |
| <b>Clinical Parameters</b>                                                                                                                                                                                                                                                                                                                                  |                                                     |                                                                                                                                                   |                                       |
| FBC + HCT                                                                                                                                                                                                                                                                                                                                                   | Daily or more frequently if indicated               | 4-12 hourly depending on clinical status<br><br><b>In shock</b><br>Repeated before and after each attempt of fluid resuscitation and as indicated | Daily                                 |
| BUSE/ Creatinine<br>LFT<br>RBS<br>Coagulation profile<br>HCO <sub>3</sub> / TCO <sub>2</sub> / Lactate                                                                                                                                                                                                                                                      | As indicated                                        | At least daily or more frequently as indicated<br><br><b>In shock</b><br>Crucial to monitor acid-base balance/ ABG closely                        | As indicated                          |

Adapted from <sup>2</sup>, Level 9; <sup>65</sup>, Level 9

INTENSIVE CARE UNIT

(vii) Overall fluid management (PRE TRANSFER BACK TO MEDICAL)

|                          | DF +<br>w/out<br>WS | DF +<br>WS | DF<br>compensated<br>Shock | DF<br>decompensated<br>shock | Severe<br>Dengue |
|--------------------------|---------------------|------------|----------------------------|------------------------------|------------------|
| a. bolus 20ml/kg         |                     |            |                            |                              |                  |
| b. half bolus<br>10ml/kg |                     |            |                            |                              |                  |
| c. 7 ml/kg regime        |                     |            |                            |                              |                  |
| d. 5 ml/kg regime        |                     |            |                            |                              |                  |
| e. 3 ml/kg regime        |                     |            |                            |                              |                  |
| f. 2 ml/kg regime        |                     |            |                            |                              |                  |
| g. maintenance           |                     |            |                            |                              |                  |
| h. blood<br>transfusion  |                     |            |                            |                              |                  |
| i. other regime          |                     |            |                            |                              |                  |

OVERALL OUTCOME

Patient ID :

**Part VI: Overall outcome of this dengue episode**

**A. Patient outcome**

|    |                                | Tick (✓) where appropriate |
|----|--------------------------------|----------------------------|
| 1. | Discharge without follow up    |                            |
| 2. | Discharge with follow up       |                            |
| 3. | ICU referral                   |                            |
|    | a. Admit                       |                            |
|    | b. Non-invasive Ventilation    |                            |
|    | c. Invasive Ventilation        |                            |
| 4. | Complication                   |                            |
|    | a. Thrombophlebitis            |                            |
|    | b. Fluid overload              |                            |
|    | c. Hospital Acquired Pneumonia |                            |
|    | d. Other                       |                            |
| 5. | Death                          |                            |
| 6. | Total length of hospital stay  | _____ day/s                |

**B. Discharge Criteria:**

| Criteria                                  | Documented |     | Please specify |
|-------------------------------------------|------------|-----|----------------|
|                                           | Y=1        | N=2 |                |
| Afebrile for 48H                          |            |     |                |
| Improved general condition                |            |     |                |
| Improved appetite                         |            |     |                |
| Stable haematocrit                        |            |     |                |
| Rising platelet count                     |            |     |                |
| No dyspnea or respiratory distress        |            |     |                |
| Resolved bleeding episodes                |            |     |                |
| Resolutions/recovery of organ dysfunction |            |     |                |
